# Supplementary material
Source: PubMed Central journal article supplement (PMC9853918)
Supplement: NIHMS1861781-supplement-Supl_Hit.pdf [file NIHMS1861781-supplement-Supl_Hit.pdf]

| Sample ID       | IC50 (uM) | Curve Class | Efficacy (%) |
|-----------------|-----------|-------------|--------------|
| NCGC00249758-02 | 19.18     | -2.2        | -90.55       |
| NCGC00253871-01 | 15.24     | -2.2        | -88.89       |
| NCGC00253874-01 | 17.10     | -2.2        | -87.52       |
| NCGC00249752-01 | 21.52     | -2.2        | -86.36       |
| NCGC00411091-01 | 44.08     | -2.2        | -83.34       |
| NCGC00436585-01 | 21.52     | -2.2        | -82.60       |
| NCGC00387565-01 | 21.52     | -2.2        | -80.87       |
| NCGC00253872-01 | 21.52     | -2.2        | -77.14       |
| NCGC00410042-01 | 35.01     | -2.2        | -76.88       |
| NCGC00411065-01 | 27.81     | -2.2        | -75.31       |
| NCGC00183457-01 | 7.64      | -1.2        | -73.41       |
| NCGC00411059-01 | 11.07     | -2.2        | -72.43       |
| NCGC00249756-01 | 10.79     | -1.2        | -72.04       |
| NCGC00183901-01 | 13.58     | -2.2        | -71.74       |
| NCGC00274169-01 | 6.07      | -1.2        | -71.48       |
| NCGC00253873-01 | 3.83      | -1.2        | -71.12       |
| NCGC00274168-01 | 6.81      | -1.2        | -69.99       |
| NCGC00274172-01 | 9.61      | -1.2        | -69.96       |
| NCGC00183552-01 | 13.58     | -2.2        | -68.70       |
| NCGC00345601-01 | 10.79     | -1.2        | -68.04       |
| NCGC00253910-01 | 21.52     | -2.2        | -67.93       |
| NCGC00274163-01 | 17.10     | -2.2        | -64.03       |
| NCGC00238532-01 | 55.48     | -2.2        | -63.66       |
| NCGC00486043-01 | 42.94     | -3          | -62.95       |
| NCGC00438901-01 | 21.52     | -2.2        | -59.82       |
| NCGC00415526-01 | 62.26     | -3          | -59.71       |
| NCGC00253870-02 | 15.24     | -2.2        | -58.99       |
| NCGC00445126-01 | 5.41      | -1.2        | -58.07       |
| NCGC00249685-01 | 24.15     | -2.2        | -56.01       |
| NCGC00274159-01 | 13.58     | -1.2        | -55.36       |
| NCGC00429546-01 | 30.40     | -2.2        | -53.10       |
| NCGC00120665-01 | 19.18     | -2.2        | -53.09       |
| NCGC00249286-01 | 21.52     | -2.2        | -52.85       |
| NCGC00345209-01 | 27.10     | -2.2        | -51.26       |
| NCGC00099510-01 | 9.61      | -1.2        | -50.92       |
| NCGC00249385-01 | 6.81      | -2.2        | -50.85       |
| NCGC00183578-01 | 30.40     | -3          | -49.29       |
| NCGC00183897-01 | 30.40     | -3          | -49.16       |
| NCGC00274158-01 | 24.15     | -2.2        | -48.73       |
| NCGC00238495-01 | 17.54     | -1.2        | -48.53       |
| NCGC00411254-01 | 22.09     | -1.2        | -47.22       |
| NCGC00411080-01 | 35.01     | -2.2        | -46.64       |
| NCGC00274171-38 | 27.10     | -2.2        | -46.00       |
| NCGC00348340-01 | 30.40     | -3          | -43.93       |
| NCGC00249381-01 | 17.10     | -2.2        | -43.90       |
| NCGC00390961-01 | 19.18     | -2.2        | -42.67       |
| NCGC00461841-01 | 15.24     | -2.2        | -42.23       |

|                 |       |      |        |
|-----------------|-------|------|--------|
| NCGC00487199-01 | 3.83  | -1.2 | -41.92 |
| NCGC00442771-01 | 21.52 | -2.2 | -41.50 |
| NCGC00344500-01 | 19.18 | -2.2 | -39.39 |
| NCGC00428589-01 | 21.52 | -2.2 | -38.43 |
| NCGC00411178-01 | 39.28 | -2.4 | -37.49 |
| NCGC00249295-01 | 21.52 | -2.2 | -36.96 |
| NCGC00121701-01 | 24.15 | -2.2 | -36.96 |
| NCGC00411172-01 | 44.08 | -2.4 | -35.51 |
| NCGC00378200-01 | 27.10 | -3   | -35.50 |
| NCGC00441250-01 | 24.15 | -2.4 | -35.41 |
| NCGC00247746-01 | 5.41  | -2.4 | -35.38 |
| NCGC00486912-01 | 10.79 | -1.2 | -35.23 |
| NCGC00351354-01 | 27.10 | -2.4 | -35.03 |
| NCGC00274170-01 | 24.15 | -2.2 | -34.65 |
| NCGC00460844-01 | 27.10 | -3   | -33.11 |
| NCGC00443003-01 | 21.52 | -2.4 | -32.63 |
| NCGC00537668-01 | 24.15 | -2.4 | -32.48 |
| NCGC00183576-01 | 17.10 | -2.2 | -31.71 |
| NCGC00425516-01 | 19.18 | -2.4 | -31.67 |
| NCGC00098573-01 | 21.52 | -2.2 | -30.89 |
| NCGC00434725-01 | 19.18 | -2.4 | -30.18 |
| NCGC00595033-01 | 42.94 | 3    | 36.34  |

Structure

CCC1=CC(=CC(=C1)NC(=O)CN)C2=NN3C(=O)C=C(N=C3S2)N4CCNCC4  
CC(=C)C1=CC(=CC(=C1)NC(=O)CN)C2=NN3C(=O)C=C(N=C3S2)N4CCNCC4  
CC(O)C1=CC(=CC(=C1)NC(=O)CN)C2=NN3C(=O)C=C(N=C3S2)N4CCNCC4  
NCC(=O)NC1=CC(=CC(=C1)\C2=N\N/3C(=O)\C=C(/N=C3S2)N4CCNCC4)C(F)(F)F  
C1CN(CC2=CSC=C2)CC3=C(N1)C=C(NC4=CC=CC=C4)N=C3  
CC1=C(CNC(=O)C2=C(O)C3=NC=CC=C3C=C2)C4=C(CNCC4)C=N1  
O[C@@H]1[C@@H](O)[C@H](OCCCC[N]2C=C(C(=O)C3=C4C=CC=CC4=CC=C3)C5=C2C=CC=C5)O[C@@H]([C@H]1O)C(O)=C  
CC(C)C1=CC(=CC(=C1)NC(=O)CN)C2=NN3C(=O)C=C(N=C3S2)N4CCNCC4  
OC1=CC=C(CN2[C@H]3CCN(CC[C@H]3OCC2=O)CC4=CC=C5[NH]C=CC5=C4)C=C1  
CN(C)C1=CC=C(CN2CCN3=C(C2)C=NC(=C3)NC4=CC=CC=C4)C=C1  
NC1=CC=C(C=C1)C2=CC=CC(=C2)C3=N/N/4C(=O)\C=C(/N=C4S3)N5CCNCC5  
C1CN(CC2CC2)CC3=C(N1)C=C(NC4=CC=CC=C4)N=C3  
NCC(=O)NC1=CC(=CC(=C1)C2=NN/3C(=O)\C=C(/N=C3S2)N4CCNCC4)Br  
O=C1\C=C(/N=C\2S\C(=N/N12)C3=CC(=CC=C3)NCC4=CC=NC=C4)N5CCNCC5  
C[C@H](O)C1=CC(=CC(=C1)NC(=O)CN)\C2=N\N/3C(=O)\C=C(/N=C3S2)N4CCNCC4  
CC(=O)C1=CC(=CC(=C1)NC(=O)CN)C2=NN3C(=O)C=C(N=C3S2)N4CCNCC4  
C[C@H](O)C1=CC(=CC(=C1)NC(=O)CN)\C2=N\N/3C(=O)\C=C(/N=C3S2)N4CCNCC4  
NNC(=O)NC1=CC=CC(=C1)\C2=N\N/3C(=O)\C=C(/N=C3S2)N4CCNCC4  
NC(=O)C1CCN(CC1)C2=NC(=CS2)C3=CC=CC=C3  
O=C1\C=C(/N=C\2S\C(=N\N12)/C3=CC(=NC=C3)NC4CCCNC4)N5CCNCC5  
NC1=CC(=CC(=C1)\C2=N\N/3C(=O)\C=C(/N=C3S2)N4CCNCC4)C(F)(F)F  
NCC(=O)NC1=CC(=CC(=C1)B(O)O)\C2=N\N/3C(=O)\C=C(/N=C3S2)N4CCNCC4  
ClC1=C(OC2=CC=CC=C12)C(=O)NC3=CC=C4OC(=NC4=C3)C5=CC=CN=C5  
C(C(C([2H]))([2H]))([2H])NC(=N)NC(=N)NC1=CC=C(Cl)C=C1)([2H])([2H])[2H]  
C1CNCC2=CC(=N[N]2C1)C3=NC=C[N]3CCC[N]4N=CC5=C4C=CC=C5  
CC1(N(CC(O)=O)C(=O)OC12CCN(CC2)C(=O)CC3=CC=CC=N3)C4=CC=CC=C4  
NCC(=O)NC1=CC=CC(=C1)C2=NN3C(=O)C=C(N=C3S2)C4CCNCC4  
C1CN(CCC1C2CCN(C2)CC3=CC=C[NH]3)CC4=CC=CN=C4  
CN1CCN(CC1)C2=CC3=C([NH]C(=N3)C/4=C(\N)C5=C(F)C=CC=C5NC4=O)C=C2  
NCC(=O)NC1=CC(=CC(=C1)O)\C2=N\N/3C(=O)\C=C(/N=C3S2)N4CCNCC4  
O=C(CCC[C@@H]1[C@H]2CCN3CCC[C@@H](CN1C(=O)C4=CN=CC=C4)[C@@H]23)N5CCCCC5  
FC1=CC(=CC=C1)C(=O)NCC(N2CCC3=C2C=CC=C3)C4=CN=CC=C4  
BrC1=CC=C2[NH]C(=NC2=C1)NC3=CC=C(C=C3)C(=O)NCC4=CN=CC=C4  
[O-][S+](=O)(N1CCOCC1)C2=CC=C(NC(=O)C3=CC=C(CN4CCC5=CC=CC=C5C4)C=C3)C=C2  
ClC1=C(Cl)C(=CC=C1)C2=CC=C(O2)C(=O)NC3=CC=CC(=C3)C4=NC5=C(O4)C=CC=N5  
OC1=CC(=CC2=CC=CN=C12)C3=CC(=CC=C3)C(=O)NCCCCN4CCOCC4  
NC(=O)C1CCN(CC1)C2=NC(=CS2)C3=C4C=CC=CC4=CC=C3  
O=C1\C=C(/N=C\2S\C(=N/N12)C3=CC(=CC=C3)C4=CN=CN=C4)N5CCNCC5  
NCC(=O)NC1=CC(=CC(=C1)CO)\C2=N\N/3C(=O)\C=C(/N=C3S2)N4CCNCC4  
ClC1=CC=CC(=C1)C2=NC3=CC(=CC=C3O2)NC(=O)C4=CC=CN=C4  
CCCN1CCNC2=C(C1)C=NC(=C2)NC3=CC=CC=C3  
COC1=CC=C(CN2CCN3=C(C2)C=NC(=C3)NC4=CC=CC=C4)C=N1  
NCC(=O)NC1=CC(=CN=C1)C2=N/N/3C(S2)=N/C(=C\C3=O)N4CCNCC4  
[O-][S+](=O)(N1CCOCC1)C2=CC=C(NC(=O)C3=CC=C(CCN4CCC5=C(C4)C=CC=C5)C=C3)C=C2  
CC1=CC=CC(=C1)CN2CCN(CC2)C3=CN=C4C(=CC=C(C(O)=O)C4=C3)O  
OC(=O)C[C@@H]1CCN(C[C@@H]1CCN2CCN(CC2)C3=CC=CC=C3)C(=O)C4CCCCC4  
COCC1CN(CC2=C[NH]C3=CC=CC=C23)CC14CCNCC4

CC1=CC(=C(CNC(=N)NC(=O)C2=C(N)N=C(NCC3=CC=C(Cl)C=C3)C(=N2)Cl)C=C1)C  
CN1C(=O)CC(C(O)=O)C12CCN(CC2)C/C=C/C3=CC=CC=C3  
NC1=CC(=CC=N1)\C2=N\N/3C(=O)\C=C(/N=C3S2)N4CCNCC4  
O=C(CCC[C@H]1NC[C@@H]2C[C@H]1CN(C2)CC3=CC=CC=C3)N4CCN(CC4)C5=NC=CC=N5  
COC1=CC=C(NC2=CC3=C(CN(CCN3)CCC4=CC=CC=C4)C=N2)C=C1OC  
BrC1=CC=C2[NH]C(=NC2=C1)NC3=CC=C(C=C3)C(=O)NCN4CCOCC4  
CC1=CC=C(C=C1)C2=C[N]3C(=N2)SC4=CC(=CC=C34)C(=O)NCCCN5CCCCC5  
COC1=CC(=CC=C1)CN2CCNC3=C(C2)C=NC(=C3)NC4=CC=CC=C4  
N[C@H](C(=O)N1CCC2(CC1)N(CNC2=O)C(=O)CC3=C[NH]C4=C3C=CC=C4)C5=CC=CC=C5  
CC1=N[N](CCC[N]2C=CN=C2C3=N[N]4CCCNCC4=C3)C(=N1)C  
CN(C)CCCN1CCN(CC1)C(=O)C2=CC=CC(=C2)C3=CC4=CC=CN=C4C(=C3)O  
OC1=CC=CC(=C1)NC2=CC=NC3=C2SC(=C3)C4=CC=CC(=C4)CN5CCOCC5  
[O-][S+](=O)(N1CCOCC1)C2=CC=C(NC(=O)C3=CC=C(CN4CCC(CC4)C5=CC=CC=C5)C=C3)C=C2  
NCC(=O)NC1=CC(=CC(=C1)C(O)=O)\C2=N\N/3C(=O)\C=C(/N=C3S2)N4CCNCC4  
COC1=CC=C2[NH]C3=C(CCN34CCN(CC4)CC5=CC=C(C)O5)C2=C1  
CCN1CCCC1C[N]2C=CN=C2C3=N[N]4CCCNCC4=C3  
CC(=O)NCC(=O)NC1=CN=CC(=C1)/C2=N/N/3C(=O)\C=C(/N=C3S2)N4CCNCC4  
CC1=CC=CC(=C1)C2=CSC(=N2)N3CCC(CC3)C(N)=O  
CC1=C(CN2CCCC(CNC(=O)C3=CC=CC4=C3C=CC=C4)C2)[NH]C5=CC=CC=C15  
CC[N]1C2=C(C=CC=C2)C3=C1C=CC(=C3)CN4CCN(CC4)CC5=CC=C(OC)C(=C5)OC  
CC1=C(CNC(=O)C2=CC=CC=C2N3CCOCC3)C4=C(CNCC4)C=N1  
CC1=CC=C(C2=NC3=CC(NC(=O)C4=CC=CO4)=CC=C3O2)C(C)=C1

Supplier  
NCGCChem  
NCGCChem  
NCGCChem  
NCGCChem  
Charles River  
Chembridge  
Cayman  
NCGCChem  
Charles River  
Charles River  
NCGCChem  
Charles River  
NCGCChem  
Vitas  
MedChem Express  
Chembridge  
Charles River  
NCGCChem  
Chemdiv  
LC Labs  
NCGCChem  
Chemdiv  
Sytravon  
NCGCChem  
NCGCChem  
Sytravon  
NCGCChem  
NCGCChem  
NCGCChem  
NCGCChem  
Asinex  
Charles River  
Charles River  
NCGCChem  
NCGCChem  
NCGCChem  
Analyticon  
Chemdiv

SIGMA  
Chembridge  
NCGCChem  
Chemdiv  
Charles River  
NCGCChem  
Sytravon  
Charles River  
ChemRoutes  
Chembridge  
NCGCChem  
Tocris  
NCGCChem  
NCGCChem  
Chemdiv  
Chembridge  
NCGCChem  
NCGCChem  
Chembridge  
Sytravon  
Chembridge  
Chembridge
