# Supplementary material
Source: PubMed Central journal article supplement (PMC9853918)
Supplement: NIHMS1861781-supplement-Supl_Plot.pdf [file NIHMS1861781-supplement-Supl_Plot.pdf]

## **Virtual screening for the discovery of microbiome $\beta$ -glucuronidase inhibitors to alleviate cancer drug toxicity**

**Authors:** Anup P. Challa<sup>1,2,3,\*</sup>, Xin Hu<sup>3</sup>, Ya-Qin Zhang<sup>3</sup>, Jeffrey Hymes<sup>4</sup>, Bret D. Wallace<sup>4</sup>, Surendra Karavadhi<sup>3</sup>, Hongmao Sun<sup>3</sup>, Samarjit Patnaik<sup>3</sup>, Matthew D. Hall<sup>3</sup>, Min Shen<sup>3,\*</sup>

### **Affiliations:**

<sup>1</sup>Department of Chemical and Biomolecular Engineering, Vanderbilt University, Nashville, TN, USA 37212

<sup>2</sup>Vanderbilt Institute for Clinical and Translational Research, Vanderbilt University Medical Center, Nashville, TN, USA 37203

<sup>3</sup>National Center for Advancing Translational Sciences, National Institutes of Health, Rockville, MD, USA 20850

<sup>4</sup>Symberix, Inc., 4819 Emperor Blvd., Suite 400, Durham, NC, USA 27703

\*Corresponding authors

### **Contact:**

Min Shen, PhD

Division of Pre-Clinical Innovation

National Center for Advancing Translational Sciences

National Institutes of Health

9800 Medical Center Dr.,

Rockville, MD 20850,

United States of America

Email: [shenmin@mail.nih.gov](mailto:shenmin@mail.nih.gov)

Tel. (desk): +1-301-480-9794

Anup P. Challa, MS, EIT

Vanderbilt University,

PMB 350969,

2301 Vanderbilt Pl.,

Nashville, TN 37203,

United States of America

E-mail: [sb108vg@gmail.com](mailto:sb108vg@gmail.com)

Tel. (mobile): +1-901-361-6583

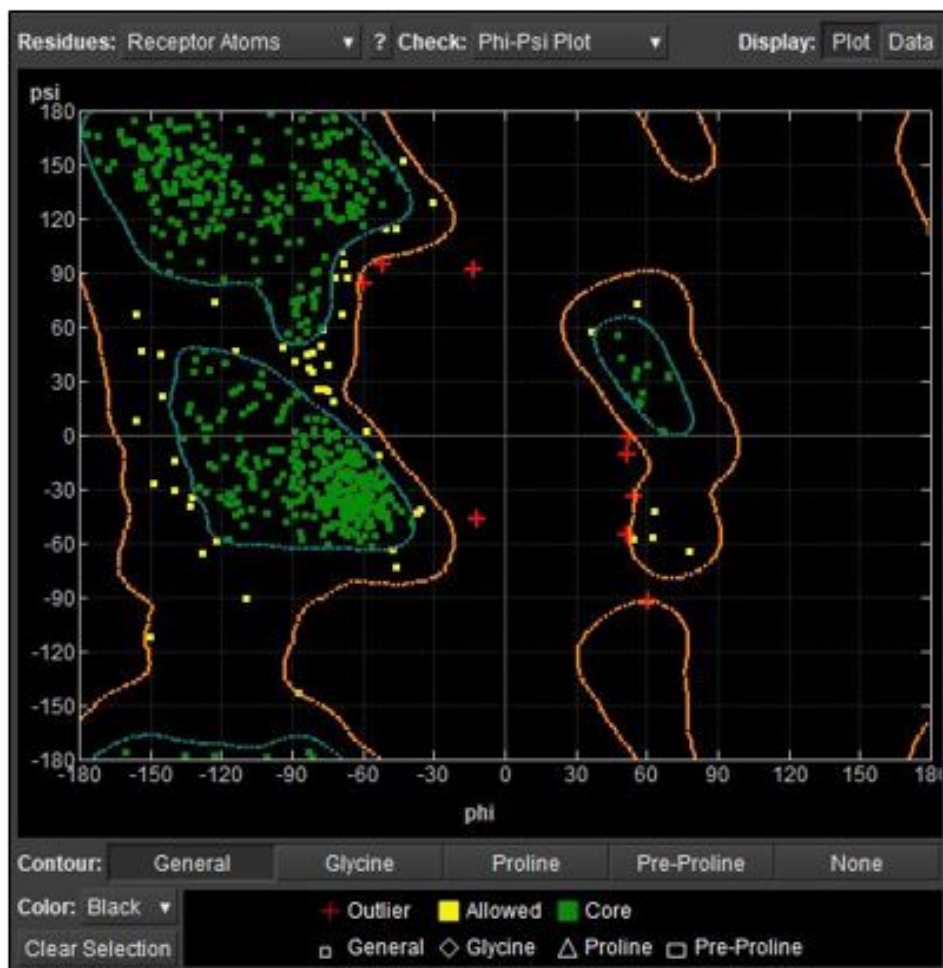

**Supplementary Figure 1.** Ramachandran plot of the  $\beta$ -glucuronidase homology model to demonstrate the quality of the predicted 3-dimensional structure. The plot is generated using Molecular Operating Environment (MOE) computational software.
